# Supplementary material for: The Thermodynamic and Kinetic Effects of Sodium Lignin Sulfonate on Ethylene Hydrate Formation
Source: MDPI journal article supplement (doi:10.3390/en14113291), 2021-06-04
Supplement: s1 [file s1]

# The Thermodynamic and Kinetic Effects of Sodium Lignin Sulfonate on Ethylene Hydrate Formation

Yiwei Wang <sup>1</sup>, Lin Wang <sup>2</sup>, Zhen Hu <sup>2</sup>, Youli Li <sup>2</sup>, Qiang Sun <sup>2</sup>, Aixian Liu <sup>1</sup>, Lanying Yang <sup>2</sup>, Jing Gong <sup>3</sup> and Xuqiang Guo <sup>1,\*</sup>

<sup>1</sup> State Key Laboratory of Heavy Oil Processing, China University of Petroleum Beijing at Karamay, Karamay 834000, China; wyw@cup.edu.cn (Y.W.W.); liuaixianshiyou@sina.com (A.X.L.)

<sup>2</sup> State Key Laboratory of Heavy Oil Processing, China University of Petroleum (Beijing), Beijing 102249, China; Wanglin25@163.com (L.W.); hzzdeyouxiang2020@163.com (Z.H.); email (Y.L.L.); sunq@cup.edu.cn (Q.S.); ylygsh@163.com (L.Y.Y.)

<sup>3</sup> National Engineering Laboratory for Pipeline Safety/MOE Key Laboratory of Petroleum Engineering/ Beijing Key Laboratory of Urban Oil and Gas Distribution Technology, China University of Petroleum (Beijing), Beijing 102249, China; ydgj@cup.edu.cn

\* Correspondence: guoxq@cup.edu.cn; Tel.: +86-0990-6633300

## S1. The interfacial tension between ethylene gas and SLS solution

**Table S1.** The interfacial tensions (mN·m<sup>-1</sup>) between ethylene gas and different liquids at different temperatures under 0.5 MPa.

| T(K)   | 0.05 mass%  |                                | 0.10 mass%  |                                | 0.20 mass%  |                                | 0.50 mass%  |                                | Pure water  |                                |
|--------|-------------|--------------------------------|-------------|--------------------------------|-------------|--------------------------------|-------------|--------------------------------|-------------|--------------------------------|
|        | <i>Data</i> | <i>Data<sub>u</sub></i><br>(±) |
| 276.15 | 64.5        | 0.5                            | 62.1        | 0.5                            | 62.6        | 0.5                            | 63.4        | 0.6                            | 75.2        | 0.5                            |
| 277.15 | 64.0        | 0.4                            | 61.5        | 0.5                            | 61.9        | 0.3                            | 62.9        | 0.4                            | -           | -                              |
| 278.15 | 63.3        | 0.5                            | 60.9        | 0.4                            | 61.2        | 0.4                            | 62.4        | 0.6                            | 74.8        | 0.5                            |
| 279.15 | 62.9        | 0.5                            | 60.2        | 0.6                            | 60.6        | 0.6                            | 61.8        | 0.5                            | -           | -                              |
| 280.15 | 62.2        | 0.5                            | 59.8        | 0.3                            | 60.1        | 0.5                            | 61.3        | 0.4                            | 74.4        | 0.4                            |
| 281.15 | 61.7        | 0.5                            | 59.5        | 0.6                            | 59.8        | 0.4                            | 60.9        | 0.5                            | -           | -                              |
| 282.15 | 61.1        | 0.6                            | 59.3        | 0.5                            | 59.6        | 0.6                            | 60.5        | 0.5                            | 74.2        | 0.5                            |
| 283.15 | 60.8        | 0.5                            | 58.7        | 0.5                            | 59.2        | 0.3                            | 60.0        | 0.5                            | -           | -                              |
| 284.15 | 60.3        | 0.6                            | 58.5        | 0.6                            | 58.9        | 0.5                            | 59.6        | 0.6                            | 74.0        | 0.5                            |
| 285.15 | 60.0        | 0.5                            | 58.2        | 0.5                            | 58.6        | 0.6                            | 59.2        | 0.5                            | -           | -                              |
| 286.15 | 59.6        | 0.3                            | 58.0        | 0.4                            | 58.4        | 0.5                            | 58.6        | 0.4                            | 73.9        | 0.5                            |

**Table S2.** The interfacial tensions ( $\text{mN}\cdot\text{m}^{-1}$ ) between ethylene gas and different liquids under different pressures at 286.15 K.

| w(mass%) | 0.5 MPa           |               | 1.0 MPa           |               | 1.5 MPa           |               | 2.0 MPa           |               |
|----------|-------------------|---------------|-------------------|---------------|-------------------|---------------|-------------------|---------------|
|          | $\overline{Data}$ | $Data_u(\pm)$ | $\overline{Data}$ | $Data_u(\pm)$ | $\overline{Data}$ | $Data_u(\pm)$ | $\overline{Data}$ | $Data_u(\pm)$ |
| 0        | 73.9              | 0.5           | 72.8              | 0.5           | 72.0              | 0.5           | 71.2              | 0.4           |
| 0.05     | 59.6              | 0.3           | 58.4              | 0.6           | 57.5              | 0.4           | 56.8              | 0.5           |
| 0.10     | 58.0              | 0.4           | 56.8              | 0.4           | 55.9              | 0.5           | 55.2              | 0.4           |
| 0.20     | 58.4              | 0.5           | 57.2              | 0.5           | 56.3              | 0.4           | 55.6              | 0.5           |
| 0.50     | 58.6              | 0.4           | 57.4              | 0.5           | 56.4              | 0.4           | 55.7              | 0.4           |

## S2. The uncertainties caused by the uncertainties of the measurements in each individual experiment

As shown in Section 2.5, the amount of the ethylene in hydrate slurry ( $N_{d,t,jjj}$ , mol) at the time  $t$  in an individual experiment is calculated by Equation (1). The uncertainties in the volume of the crystallizer ( $\pm 0.05$  ml), temperature ( $\pm 0.05\text{K}$ ) and pressure ( $\pm 0.005$  MPa) are considered while calculating the uncertainty in  $N_{d,t,jjj}$ . The maximum ( $N_{d,t,max,jjj}$ ) and minimum ( $N_{d,t,min,jjj}$ ) values of  $N_{d,t,jjj}$  in each individual experiment due to the uncertainties of measurements are calculated by Equations (S1) and (S2). The uncertainty of  $N_{d,t,jjj}$  caused by uncertainties of measurements in each individual experiment ( $N_{d,t,u,jjj}$ ) is calculated by Equation (S3):

$$N_{d,t,max,jjj} = \frac{P_f + 0.005\text{MPa}}{Z \cdot R \cdot (T_f - 0.05\text{K})} \cdot [(V_{cr,0} + 0.05 \text{ ml}) - (V_{cr,t} - 0.05 \text{ ml})] \quad (\text{S1})$$

$$N_{d,t,min,jjj} = \frac{P_f - 0.005\text{MPa}}{Z \cdot R \cdot (T_f + 0.05\text{K})} \cdot [(V_{cr,0} - 0.05 \text{ ml}) - (V_{cr,t} + 0.05 \text{ ml})] \quad (\text{S2})$$

$$N_{d,t,u,jjj} = \max\{|N_{d,t,max,jjj} - N_{d,t,jjj}|, |N_{d,t,jjj} - N_{d,t,min,jjj}|\} \quad (\text{S3})$$

where  $jjj$  is the sequence number for the repeated experiments under the same experimental condition. The uncertainties of  $GSCHS$ ,  $R_{WH,end}$  and  $w_{p,end}$  caused by the uncertainties of measurements in each individual experiment are calculated by Equations (S4) to (S10):

$$R_{WH,end,max,jjj} = N_{d,t,max,jjj}/\lambda_2 / [(m_0 - m_{SLS})/M_w] \times 100\% \quad (\text{S4})$$

$$R_{WH,end,min,jjj} = N_{d,t,min,jjj}/\lambda_2 / [(m_0 - m_{SLS})/M_w] \times 100\% \quad (\text{S5})$$

$$R_{WH,end,u,jjj} = \max\{|R_{WH,end,max,jjj} - R_{WH,end,jjj}|, |R_{WH,end,jjj} - R_{WH,end,min,jjj}|\} \quad (\text{S6})$$

$$w_{p,end,max,jjj} = m_{SLS}/(m_0 - M_w \cdot N_{d,end,max,jjj}/\lambda_2) \times 100\% \quad (\text{S7})$$

$$w_{p,end,min,jjj} = m_{SLS}/(m_0 - M_w \cdot N_{d,end,min,jjj}/\lambda_2) \times 100\% \quad (S8)$$

$$w_{p,end,u,jjj} = \max\{|w_{p,end,max,jjj} - w_{p,end,jjj}|, |w_{p,end,jjj} - w_{p,end,min,jjj}|\} \quad (S9)$$

$$GSCHS_{u,jjj} = \left| \frac{Z_{st,jjj} \cdot N_{d,end,u,jjj} \cdot R \cdot T_{st}}{P_{st} \cdot V_{sol}} \right| \quad (S10)$$

The experimental data of each individual experiment and the uncertainties caused by uncertainties of measurements in each individual experiment are shown in Table S3. It can be seen from Table S3 that the uncertainties caused by the uncertainties of the measurements in each individual experiment are much smaller than the uncertainties caused by the repeated experiments in Tables 2 and 3. For this reason, the uncertainties caused by the repeated experiments are used to describe the uncertainties of the experiments under each experimental condition.

**Table S3.** The effect of SLS on hydrate formation.

| No. | $w_{p,0}$<br>(mass%) | $T$<br>(K) | $P$<br>(MPa) | $GSCHS$<br>(NL/L) | $GSCHS_u$<br>(NL/L) | $P_{eq,0}$ (MPa) | $DRS_0$<br>(%) | $P_{eq,end}$ (MPa) | $DRS_{end}$<br>(%) | $R_{WH,end}$<br>(%) | $R_{WH,end,u}$<br>(%) | $w_{p,end}$<br>(mass%) | $w_{p,end,u}$<br>(mass%) |
|-----|----------------------|------------|--------------|-------------------|---------------------|------------------|----------------|--------------------|--------------------|---------------------|-----------------------|------------------------|--------------------------|
| 1   | 0.10                 | 278.15     | 1.12         | 107.7             | 0.53                | 0.964            | 16.2           | 0.966              | 15.9               | 66.9                | 0.33                  | 0.30                   | 0.00                     |
| 2   | 0.10                 | 278.15     | 1.12         | 110.1             | 0.54                | 0.964            | 16.2           | 0.966              | 15.9               | 68.4                | 0.34                  | 0.32                   | 0.00                     |
| 3   | 0.10                 | 278.15     | 1.12         | 112.4             | 0.56                | 0.964            | 16.2           | 0.966              | 15.9               | 69.8                | 0.35                  | 0.33                   | 0.00                     |
| 4   | 0.10                 | 278.15     | 1.24         | 120.6             | 0.54                | 0.964            | 28.6           | 0.967              | 28.2               | 74.9                | 0.34                  | 0.40                   | 0.01                     |
| 5   | 0.10                 | 278.15     | 1.24         | 125.0             | 0.56                | 0.964            | 28.6           | 0.967              | 28.2               | 77.7                | 0.35                  | 0.45                   | 0.01                     |
| 6   | 0.10                 | 278.15     | 1.24         | 126.3             | 0.57                | 0.964            | 28.6           | 0.967              | 28.2               | 78.5                | 0.35                  | 0.46                   | 0.01                     |
| 7   | 0.10                 | 278.15     | 1.49         | 124.8             | 0.48                | 0.964            | 54.6           | 0.967              | 54.1               | 77.6                | 0.30                  | 0.44                   | 0.01                     |
| 8   | 0.10                 | 278.15     | 1.49         | 130.7             | 0.51                | 0.964            | 54.6           | 0.968              | 53.9               | 81.2                | 0.32                  | 0.53                   | 0.01                     |
| 9   | 0.10                 | 278.15     | 1.49         | 128.9             | 0.50                | 0.964            | 54.6           | 0.967              | 54.1               | 80.1                | 0.31                  | 0.50                   | 0.01                     |
| 10  | 0.10                 | 278.15     | 2.00         | 121.7             | 0.39                | 0.964            | 107.5          | 0.967              | 106.8              | 75.6                | 0.24                  | 0.41                   | 0.00                     |
| 11  | 0.10                 | 278.15     | 2.00         | 125.3             | 0.40                | 0.964            | 107.5          | 0.967              | 106.8              | 77.9                | 0.25                  | 0.45                   | 0.00                     |
| 12  | 0.10                 | 278.15     | 2.00         | 120.2             | 0.39                | 0.964            | 107.5          | 0.967              | 106.8              | 74.7                | 0.24                  | 0.39                   | 0.00                     |
| 13  | 0.00                 | 278.15     | 1.24         | 92.6              | 0.43                | 0.963            | 28.8           | 0.963              | 28.8               | 57.5                | 0.27                  | 0.00                   | 0.00                     |
| 14  | 0.00                 | 278.15     | 1.24         | 90.2              | 0.42                | 0.963            | 28.8           | 0.963              | 28.8               | 56.0                | 0.26                  | 0.00                   | 0.00                     |
| 15  | 0.00                 | 278.15     | 1.24         | 95.4              | 0.45                | 0.963            | 28.8           | 0.963              | 28.8               | 59.2                | 0.28                  | 0.00                   | 0.00                     |
| 16  | 0.05                 | 278.15     | 1.24         | 114.1             | 0.52                | 0.964            | 28.6           | 0.965              | 28.5               | 70.9                | 0.32                  | 0.17                   | 0.00                     |
| 17  | 0.05                 | 278.15     | 1.24         | 109.4             | 0.50                | 0.964            | 28.6           | 0.965              | 28.5               | 68.0                | 0.31                  | 0.16                   | 0.00                     |
| 18  | 0.05                 | 278.15     | 1.24         | 115.2             | 0.52                | 0.964            | 28.6           | 0.965              | 28.5               | 71.5                | 0.32                  | 0.18                   | 0.00                     |
| 19  | 0.10                 | 278.15     | 1.24         | 120.6             | 0.54                | 0.964            | 28.6           | 0.967              | 28.2               | 74.9                | 0.34                  | 0.40                   | 0.01                     |
| 20  | 0.10                 | 278.15     | 1.24         | 125.0             | 0.56                | 0.964            | 28.6           | 0.967              | 28.2               | 77.7                | 0.35                  | 0.45                   | 0.01                     |
| 21  | 0.10                 | 278.15     | 1.24         | 126.3             | 0.57                | 0.964            | 28.6           | 0.967              | 28.2               | 78.5                | 0.35                  | 0.46                   | 0.01                     |
| 22  | 0.20                 | 278.15     | 1.24         | 119.1             | 0.54                | 0.965            | 28.5           | 0.970              | 27.8               | 74.1                | 0.34                  | 0.77                   | 0.01                     |
| 23  | 0.20                 | 278.15     | 1.24         | 124.0             | 0.56                | 0.965            | 28.5           | 0.971              | 27.7               | 77.1                | 0.35                  | 0.87                   | 0.01                     |
| 24  | 0.20                 | 278.15     | 1.24         | 121.7             | 0.55                | 0.965            | 28.5           | 0.970              | 27.8               | 75.7                | 0.34                  | 0.82                   | 0.01                     |
| 25  | 0.50                 | 278.15     | 1.24         | 117.4             | 0.53                | 0.967            | 28.2           | 0.979              | 26.7               | 73.3                | 0.33                  | 1.84                   | 0.02                     |
| 26  | 0.50                 | 278.15     | 1.24         | 115.3             | 0.53                | 0.967            | 28.2           | 0.978              | 26.8               | 71.9                | 0.33                  | 1.76                   | 0.02                     |
| 27  | 0.50                 | 278.15     | 1.24         | 119.5             | 0.54                | 0.967            | 28.2           | 0.980              | 26.5               | 74.5                | 0.34                  | 1.94                   | 0.03                     |

### S3. The calculation of $f_{C_2H_4}^0$

$f_{C_2H_4}^0$  in Equation (12) can be calculated as follows and the corresponding parameters are listed in Table S4 [27, 39]:

$$f_{C_2H_4}^0 = f_T^0(T) \cdot \exp\left(\frac{\beta P}{T}\right) \cdot \alpha_w^{-1/\lambda_2} \quad (S11)$$

where  $f_T^0(T)$  is a function of temperature,  $\beta$  is a parameter which depends on the structure of the hydrate.  $\alpha_w$  is the activity of the water in the liquid phase. In this work,  $f_T^0(T)$  is correlated as a function of temperature through the following Antoine-type equation [27,39]:

$$f_T^0(T) = A' \exp [B'/(T - C')] \quad (S12)$$

**Table 4.** The parameters for the calculation of  $f^0$ .

| Structure I                   | A'/bar                  | B'/K     | C'/K | $\beta$ /(K/bar) | $\lambda_1$ | $\lambda_2$ |
|-------------------------------|-------------------------|----------|------|------------------|-------------|-------------|
| C <sub>2</sub> H <sub>4</sub> | 4.8418×10 <sup>11</sup> | -5597.59 | 51.8 | 0.4242           | 1/23        | 3/23        |

SLS solution is a kind of electrolyte solution, the thermodynamic properties of the liquid phase are calculated by the Modified Patel-Teja equation of state (MPT EOS) [45].  $\alpha_w$  in Equation (S11) can be calculated by Equation (S13) [27]:

$$\alpha_w = f_w/f_{w,0} \quad (S13)$$

where  $f_w$  is the fugacity of the water in the solution and  $f_{w,0}$  is the fugacity of pure water. Since the contribution to the complex nature of the phase equilibria of the electrolyte system is mainly from the liquid phase, it is assumed that no ion is in the gas phase [45,50]. The fugacity coefficient of component j in liquid phase is composed of two terms: an equation of state term (short-range interactions) and a Debye-Huckel electrostatic term (long-range interionic forces) [45,50]:

$$\ln \phi_j = \ln \phi_{j,EOS} + \ln \phi_{j,DH} \quad (S14)$$

where  $\phi_{j,EOS}$  is the fugacity coefficient expression derived from PT EOS [45, 50]. For ionic species, the parameter  $a$  in PT EOS is calculated by following equation [45,50]:

$$a = 15.42072\pi \cdot \varepsilon \cdot N_a^2 \cdot \psi^3 \times 10^{-13} \quad (S15)$$

where  $N_a$  is Avogadro number.  $\psi$  is ionic diameter (Na<sup>+</sup>: 1.92Å [27,50]). The ionic energy parameter ( $\varepsilon$ ) is calculated by using the dispersion theory [45,50]:

$$\varepsilon/k = 2.2789 \times 10^{-8} \eta^{0.5} \cdot a_0^{1.5} \cdot \psi^{-6} \quad (S16)$$

where  $\eta$  and  $a_0$  stand for the number of electrons in an ion and the polarizability (Na<sup>+</sup>: 0.18Å<sup>3</sup> [45,50]) of an ion, respectively.  $k$  is Boltzmann constant (1.38066×10<sup>-16</sup>erg·K<sup>-1</sup> [45,50]). The parameters  $b$  and  $c$  can be calculated as [45,50]:

$$b = 2/3\pi \cdot N_a \cdot \psi^3 \times 10^{-6} \quad (S17)$$

$$c = b \quad (S18)$$

The  $\ln\varphi_{i,DH}$  in Equation (S14) is a Debye-Huckel expression using fully dissociated salt as standard state [45,50]:

$$\ln\varphi_{i,DH} = -A'' \left[ \frac{2Z_i^2}{B''} \ln \left( \frac{1 + B'' \cdot I^{0.5}}{1 + B''/\sqrt{2}} \right) + \frac{I^{0.5}Z_i^2 - 2I^{1.5}}{1 + B'' \cdot I^{0.5}} \right] \quad (S19)$$

$$I = 0.5 \sum_j x_j Z_i^2 \quad (S20)$$

$$A'' = \frac{1}{3} (2\pi \cdot N_a \cdot d_0/M_w)^{0.5} \cdot (e^2/DkT)^{1.5} \quad (S21)$$

$$B'' = 2150(d_0/DT)^{0.5} \quad (S22)$$

$$D = 78.54 \times (1 - 4.579 \times 10^{-3}tt + 1.19 \times 10^{-5}tt^2 - 2.8 \times 10^{-8}tt^3) \quad (S23)$$

$$tt = T - 298.15 \quad (S24)$$

where  $D$  stands for the dielectric constant,  $e$  stands for electronic charge ( $4.80656 \times 10^{-10}$  esu [26, 50]),  $M_w$  is the molecular weight of water,  $d_0$  is the density of water ( $\text{g}/\text{cm}^3$ ), and  $Z_i$  is the electronic charge. It should be pointed out that the Debye-Huckel term is neglected for the gas phase. The polarizability and ionic diameter of the anion of SLS ( $a_0$  of LS $^-$ :  $35.92 \text{ \AA}$ ;  $\psi$  of LS $^-$ :  $23.87 \text{ \AA}$ ) were fitted using the experimental data in Section 4.1 by trial-and-error method[15] and the fitting process is shown in Section S4.

#### S4. Determination of the $a_0$ and $\psi$ in the model by fitting experimental data

$a_0$  and  $\psi$  were fitted as:

1. The initial values of  $a_0$  and  $\psi$  were set at  $0.18 \text{ \AA}^3$  and  $1.92 \text{ \AA}$ , which are same with the values of  $\text{Na}^+$ .
2. The method shown in Figure. 2 was used to calculate the hydrate equilibrium formation pressures of ethylene gas + SLS solution systems under the operating conditions in Table 1.
3. If most of the calculated data of the ethylene gas + SLS solution systems were higher than the experimental data, then  $\psi$  was decreased or  $a_0$  was increased, and then the fitting process went to step 2. If most of the calculated data of the ethylene gas + SLS solution systems were lower than the experimental data, then  $\psi$  was increased or  $a_0$  was decreased, and then the fitting process went to step 2. In the other situations, the fitting process went to step 4.
4. The *ARD*, *MRD* and *GF* were calculated. For all the data in Table 1, if *ARD* <4%, *MRD* < 5% and *GF*>0.99, then  $\psi$  and  $a_0$  were recorded; if not, then  $\psi$  and  $a_0$  were adjusted to further optimize the parameters, and then the fitting process went to step 2.

After above fitting process,  $a_0$  and  $\psi$  were achieved ( $a_0$  of LS:  $35.92 \text{ \AA}^3$ ;  $\psi$  of LS:  $23.87 \text{ \AA}$ ). The *ARD* and *MRD* of all data in Table 1 are 1.6 % and 4.7 %, respectively. The *GF* is higher than 0.994 for all the curves (3 curves) of the thermodynamic equilibrium hydrate formation pressure vs temperature in Table 1.
